# Supplementary material
Source: publisher figshare collection journal article supplement (https://future-science-group.figshare.com/ndownloader/files/31485707)
Supplement: Supplementary file 1 [file 31485707]

## Sheet: Sheet1
GEO database individual analysis
GSE3467	GSE3678	GSE6004	GSE29265	GSE33630	GSE53157	GSE60542		Take intersection
GABRB2	DCSTAMP	TFF3	GABRB2	GABRB2	ZCCHC12	GABRB2		TENM1
CHI3L1	KLK7	GABRB2	HMGA2	ZCCHC12	GABRB2	DIO1		PRR15
CHI3L1	GABRB2	PKHD1L1	ZCCHC12	HMGA2	TFF3	PRR15		GABRB2
SERPINA1	SLC34A2	TENM1	ARHGAP36	PRR15	CLDN1	HMGA2		TFF3
CITED1	PKHD1L1	CYP1B1	TENM1	CHI3L1	PRR15	TPO		PKHD1L1
SERPINA1	GABRB2	CITED1	LRP4	TENM1	HMGA2	ZCCHC12		LRP4
ZCCHC12	LOC400794	DCN	TFF3	LRP4	PKHD1L1	PKHD1L1
TENM1	MPPED2	LRP4	CLDN1	GABRB2	DPP6	TFF3
PRR15	SPX		DPP4	ARHGAP36	FABP4	GABRB2
SFTPB	TPO	SMOC2	GABRB2	LRRK2	ADH1B	DCSTAMP
CLDN1	IGFBPL1	TPO	SERPINA1	SYTL5	SCEL	SYTL5
TACSTD2	PRR15	HBA2///HBA1	LRRK2	MMRN1	LPAR5	CHI3L1
SLC34A2	SERPINA1	ENTPD1	SCEL	RP11-476D10.1	ADH1B	MPPED2
SFTPB	DIO1	HBB	SCEL	CLDN1	MPPED2	TACSTD2
CYP1B1	LIPH	ZCCHC12	PRR15	CHI3L1	SCEL	CHI3L1
DCSTAMP	CRABP1	IGSF1	RP11-476D10.1	TFF3	LRP4	SERPINA1
GDF15	SFTPB	HBA2///HBA1	DPP4	CITED1	DPP4	DPP4
DPP4	PLA2R1	RXRG	SYTL5	DPP4	SLC4A4	SLC34A2
COMP	KLK10	PRR15	DPP6	SCEL	SYTL5	ADH1B
PDLIM4	CHI3L1	MPPED2	IGSF1	SCEL	CYP1B1	IPCEF1
TFF3	CITED1	HBA2///HBA1	TPO	KCNJ2	DPP4	TENM1
DPP4	IPCEF1	LRRK2	CITED1	SERPINA1	PLA2R1	SCEL
LRP4	HMGA2	CCL21	ADH1B	ADH1B	BEX1	LRP4
HMGA2	SLC26A4-AS1	HBA2///HBA1	HS6ST2	ECM1	CCL21	SPX
DIO1	ADH1B	CHI3L1	SERPINA1	RXRG	TENM1	FN1
PKHD1L1	LPAR5		LIPH	HS6ST2	MYOC	LRP1B
TPO	SLC4A4		HS6ST2	PKHD1L1	PDLIM4	CLDN1
MPPED2	CUX2		QPCT	HS6ST2	IPCEF1	CYP1B1
	CWH43		CLDN1	PCSK2	DPT	CITED1
	TFF3		IPCEF1	ENTPD1	SERPINA1	SERPINA1
	SFTPB		GPM6A	PDZK1IP1	DPT	SCEL
	SERPINA1		AGR2	SERPINA1	LYVE1	DPP6
	DPP4		MMRN1	THRSP	GABRB2	LRRK2
	SLC26A7		FABP4	PLAU	ENTPD1	PLA2R1
	MRO		PKHD1L1	DPP4	LYVE1	CLDN10
	ALDH1A3		CHI3L1	TACSTD2	PSD3	SLC4A4
	SCEL		CHRDL1	PLAU	COL9A3	KLK10
	CDKN2B		DPT	PCSK2	MMRN1	DGKI
	TMEM171		PCSK2	LYVE1	METTL7B	GPM6A
	FN1		KCNJ2	ADH1B	LRRK2	NCAM1
	FN1		ADH1B	CRABP1	SERPINA1	KCNJ2
	CHI3L1		GPM6A	CCL21	ENTPD1	TFCP2L1
	LRP4			LRP1B	DUSP4	ADH1B
	TMEM163			GPM6A	TNFRSF12A	RXRG
	FN1			LYVE1	LRP1B	SFTPB
	TENM1			SFTPB	ENTPD1	GPM6A
	DPP6			CYP1B1	IGFBPL1	FN1
	CLDN10			SLC27A6	HBB	SLC27A6
	LOC646736			METTL7B	CDH3	DPP4
	TMPRSS3			GPM6A	FN1	CYP1B1
	SFTPB			DIO1	AOX1	CLDN1
	TFCP2L1			PDZK1IP1	SLITRK5	DGKI /// LOC100128727
	FN1			ENTPD1	FOXP2	TRDV3
	ENTPD1			DUSP4	QPCT	SNORD3A /// SNORD3B-1 /// SNORD3B-2 /// SNORD3C /// SNORD3D
	AHNAK2			DPP4	FABP4	METTL7B
	AGR3			BEX1	RASSF6	SFTPB
	SLC26A4			TPO	FN1	TDRD9
	LRP1B			LPAR5	RYR1	DPP4
	TCEAL2			ENTPD1	DPP6	SLC26A4-AS1
	BMP8A			IPCEF1	ZMAT4	PDLIM4
	STXBP5L			CDH6	AVPR1A	CRABP1
	FABP4			FAM20A	DUSP6	CYP1B1
	RYR2			CLDN1	PDLIM4	KIT
	AK054988 /// TPTE2P1 /// TPTE2P1			SLIT1	PID1	MPPED2
				PDZRN4	GPR83	FN1
				MACROD2	LOC440934	ARHGAP36
				TRIM36	HBA1 /// HBA2
				IGSF1	PAPSS2
				PLA2R1	CWH43
				FN1	FN1
				DPP6	FN1
				TRDV3	CDH16
				SLC4A4	DUSP4
				DPT	TFCP2L1
				CYP1B1	TUSC3
				QPCT	DUSP6
				LPL	LIPH
				SFTPB	GHR
				SLC34A2	RELN
				CLDN10	FOXP2
					PAPSS2
					CWH43
					LOC100506558 /// MATN2
					WSCD2
					TGFA
					FAXC
					TUSC3
					MRO
					MPZL2
					MPPED2
					GALE
					CFD
					STXBP5L
					DIRAS2
					H19 /// MIR675
					RNF150
					SLC25A15
					GALNT7
					CAMK2N1
					NRCAM
					PTX3
					GLDC
					TUSC3
					DUSP6
					RP6-24A23.7
					PKNOX2
					CUX2
					PROS1
					PSD3
